# Supplementary material for: Kinetic isotope effects on the dissolution kinetics of solid salicylic acid in aqueous solution: evidence for solubilisation via a proton dissociation–recombination mechanismElectronic supplementary information (ESI) available: plot of dissolution vs. flow rate for the dissolution of the (110) face of salicylic acid in water and D2O. Links to refs. 12 and 15. See http://www.rsc.org/suppdata/cc/b1/b111642h/
Source: Royal Society of Chemistry journal article supplement (doi:10.1039/b111642h), 2002-03-05
Supplement: b111642h_esi1.doc [file b111642h_esi1.doc]

AFM Under Known Hydrodynamic Conditions (II)

[Barry A. Coles](mailto:barry.coles@chemistry.oxford.ac.uk) and Richard G. Compton

*Physical and Theoretical Chemistry Laboratory, Oxford University,*

*South Parks Road, Oxford OX1 3QZ, U.K.*

The novel design of flow cell, which allows AFM to be carried out under known flow conditions, was described in references [1 - 4]. This cell was developed from the Topometrix liquid immersion cell, by the addition of a new inlet tube which enabled a jet of fluid to be applied directly to the sample surface, flowing along the front of the cantilever support chip and over the cantilever (figures 1 and 2). The flow pattern is complex, and was originally solved using a two-dimensional simulation with a finite element fluid dynamics program.

Three-dimensional simulations of the flow pattern were then carried out using [FIDAP 7.62](http://www.fluent.com/) on the Columbus (DEC 8400) Superscalar Service at the [Rutherford Appleton Laboratory](http://www.rl.ac.uk/), and published on this site in March 1999 [5]. We have now extended the range of the simulations using [FIDAP 8.5](http://www.fluent.com/) on a Silicon Graphics Origin 2000, and accordingly provide the new set of files below. These files cover a larger volume of the solution, as they now include the region inside the mouth of the jet. In addition, Reynolds numbers are specified for these files which enables them to be used for a wide range of solutions and temperatures.

| **Filename** | **Reynolds no.** | **Flow rate (mL/sec)** |
| --- | --- | --- |
| [vmapf01.gz](ftp://joule.pcl.ox.ac.uk/pub/rgc/afmvmaps/vmapf01.gz) | 0.0292 | 1.4e-5 |
| [vmapf02.gz](ftp://joule.pcl.ox.ac.uk/pub/rgc/afmvmaps/vmapf02.gz) | 0.0584 | 2.8e-5 |
| [vmapf05.gz](ftp://joule.pcl.ox.ac.uk/pub/rgc/afmvmaps/vmapf05.gz) | 0.1459 | 7.01e-5 |
| [vmapf1.gz](ftp://joule.pcl.ox.ac.uk/pub/rgc/afmvmaps/vmapf1.gz) | 0.2918 | 1.4025e-4 |
| [vmapf2.gz](ftp://joule.pcl.ox.ac.uk/pub/rgc/afmvmaps/vmapf2.gz) | 0.5836 | 2.8050e-4 |
| [vmapf5.gz](ftp://joule.pcl.ox.ac.uk/pub/rgc/afmvmaps/vmapf5.gz) | 1.459 | 7.0125e-4 |
| [vmapf10.gz](ftp://joule.pcl.ox.ac.uk/pub/rgc/afmvmaps/vmapf10.gz) | 2.918 | 1.4025e-3 |
| [vmapf20.gz](ftp://joule.pcl.ox.ac.uk/pub/rgc/afmvmaps/vampf20.gz) | 5.836 | 2.8050e-3 |
| [vmapf50.gz](ftp://joule.pcl.ox.ac.uk/pub/rgc/afmvmaps/vmapf50.gz) | 14.59 | 7.0125e-3 |
| [vmapf100.gz](ftp://joule.pcl.ox.ac.uk/pub/rgc/afmvmaps/vmapf100.gz) | 29.18 | 1.4025e-2 |
| [vmapf200.gz](ftp://joule.pcl.ox.ac.uk/pub/rgc/afmvmaps/vmapf200.gz) | 58.36 | 2.8050e-2 |
| [vmapf300.gz](ftp://joule.pcl.ox.ac.uk/pub/rgc/afmvmaps/vmapf300.gz) | 87.55 | 4.2075e-2 |
| [vmapf400.gz](ftp://joule.pcl.ox.ac.uk/pub/rgc/afmvmaps/vmapf400.gz) | 113.7 | 5.6100e-2 |
| [vmapf500.gz](ftp://joule.pcl.ox.ac.uk/pub/rgc/afmvmaps/vmapf500.gz) | 142.1 | 7.0125e-2 |
| [vmapf600.gz](ftp://joule.pcl.ox.ac.uk/pub/rgc/afmvmaps/vmapf600.gz) | 170.5 | 8.415e-2 |
| [vmapf700.gz](ftp://joule.pcl.ox.ac.uk/pub/rgc/afmvmaps/vmapf700.gz) | 199.0 | 9.818e-2 |
| [vmapf1k.gz](ftp://joule.pcl.ox.ac.uk/pub/rgc/afmvmaps/vmapf1k.gz) | 284.2 | 1.403e-1 |
| [vmapf1k5.gz](ftp://joule.pcl.ox.ac.uk/pub/rgc/afmvmaps/vmapf1k5.gz) | 426.4 | 2.104e-1 |
| [vmapf2k.gz](ftp://joule.pcl.ox.ac.uk/pub/rgc/afmvmaps/vmapf2k.gz) | 568.5 | 2.805e-1 |

These files may be downloaded using ftp by clicking on the filename.

For speed of downloading, the files have been compressed using the Unix gzip command. They may be decompressed (to approximately 4Mb each) using the Unix command:

gzip -d *filename* (the .gz suffix need not be given)

Alternatively, they may be decompressed using [WinZip®](http://www.winzip.com/): Open the file in WinZip® and extract to the required directory

Each file contains 46222 records, the first of which is a header. The remaining records are of the form n, x, y, z, u, v, w where n is the node number, x, y, and z are the position coordinates for that node, and u, v, and w are the x, y, and z components of velocity at that node. In these files, coordinates are in millimeters, and velocities are in millimeters/second. The records are in the Fortran format (I7,3E12.4,3E14.6).

The volume simulated was 0.414 × 0.09 × 0.1188 cm and contained 80794 nodes. The velocity files above cover the smaller volume relevant to chemical problems, extending from the rear edge of the jet and running along the front of the cantilever support chip, having dimensions of 0.241 × 0.0395 × 0.054 cm (figure 3). The origin of coordinates is on the sample surface and directly below the front face of the jet. This volume encloses both cantilever positions, which would typically be at (0.0646, 0, 0.0188 cm) (left cantilever) and at (0.1645, 0, 0.0188 cm) (right cantilever), if using Topometrix contact AFM type 1520 tips.

Note that a graded mesh was used to minimise the number of nodes, with the highest density being used near the sample surface and in regions of high gradients. The nodes in the files lie on a rectangular grid of 71 × 21 × 31 nodes with non-uniform spacing in the x and y directions. Simulations of chemical processes using finite-difference programs will normally require a 2-dimensional velocity map giving the x and y velocity components at all points in a grid which may be uniform, and which is usually much finer than that used for the flow simulation. It is therefore necessary to interpolate from the 3-dimensional velocity distribution, to obtain a 2-dimensional velocity map.

To assist with this, we offer three Fortran77 programs. Program fndpth2.f outputs a path file containing the (x,z) coordinates in each y-plane of the flow path which passes over the tip (xt,zt) position. It also constructs a grid file containing a 2-dimensional velocity map in the surface parallel to the flow, which intersects a vertical line passing through the specified tip (xt,zt) position. This grid file is based on the finite element graded mesh spacing. To obtain values for chemical simulations, subroutine bisub1.f is offered which uses a bicubic spline interpolation from this grid file to supply the velocity components for a user-specified finite-difference grid. Program bicall1.f is a prototype calling program for bisub1. Figure 4 shows the relative position of the jet and the scanning cantilever with the relevant dimensions. The cantilever tip is at (xt, zt), and the dashed curve passing through the cantilever tip is a typical flow path as measured 8 microns above the surface. Coordinate d is measured along this flow path, giving the distance measured parallel to the flow. The 2-D velocity map from fndpth2.f will extend 0.02 cm beyond the tip position. The position of the upstream edge of the crystal or other surface being investigated is given by xc where xc  -0.053 cm. (This allows for small samples to be investigated, by embedding them in an inert surface). The user-specified grid may be restricted to a range starting from xs and ending at xe, to minimise the computation where small samples are used. Subroutine bisub1 will then return velocities at the requested number of points, equally spaced along the flow path (i.e. in coordinate d) from xs to xe, and for a grid height of ye. Further details and instructions for use will be found as comments in the source code of the programs.

These files contain the simulation results for water at 25C and the flow rates specified. By use of the Reynolds number, it is possible to adjust these results for other temperatures and/or other fluids. It is helpful to distinguish between the flow pattern (e.g. whether the jet flows closely along the surface, or spreads out into the volume) which is a function of Reynolds number, and the flow velocities, which are controlled by the volume flow rate. The flow pattern in a given file will be duplicated for any combination of density, viscosity and flow rate that reproduces the same value for Re, but the velocities must then be adjusted by the ratio of the new to the original flow rate.

Reynolds number for this cell is referenced as the value in the inlet tube, with the hydraulic diameter *d* defined as 0.054 cm, the length of one side of the square cross-section of the jet. Then the flow rate *Vf* is given by:

where  is the absolute viscosity and  is the fluid density. Thus for example, for water at 20C, the pattern in vmapf50 would be obtained at an increased flow rate of 7.9e-3 ml/sec, and therefore all velocities in the file must be multiplied by the factor 7.9/7.01. Provision for this velocity adjustment has been incorporated into the program files.

To avoid difficulties with different word processors, the figures for this paper are in separate .gif format files. These may be displayed using graphics programs, and also in some word processors (e.g. in Word 97, use *Insert - Picture - From file*). This paper, the figures, and the programs may be downloaded by ftp by clicking on the filenames below:

[in the <ftp://joule.pcl.ox.ac.uk/pub/rgc/afmvmaps> directory]

[afmflow2.doc](ftp://joule.pcl.ox.ac.uk/pub/rgc/afmvmaps/afmflow.doc) (this paper, MS Word97 format)

[afmflow2.pdf](ftp://joule.pcl.ox.ac.uk/pub/rgc/afmvmaps/afmflow.pdf) (this paper, in PDF format) [Click for Adobe Acrobat Reader](http://www.adobe.com/)

[afmfig1.gif](ftp://joule.pcl.ox.ac.uk/pub/rgc/afmvmaps/afmfig1.gif) (top view of the modified Topometrix cell)

[afmfig2.gif](ftp://joule.pcl.ox.ac.uk/pub/rgc/afmvmaps/afmfig2.gif) (detail of the mouth of the jet and the cantilever chip; only 1 cantilever shown)

[afmfg3.gif](ftp://joule.pcl.ox.ac.uk/pub/rgc/afmvmaps/afmfg3.gif) (the solution volume covered by the velocity files vmapf*nnn*)

[afmfg4.gif](ftp://joule.pcl.ox.ac.uk/pub/rgc/afmvmaps/afmfg4.gif) (the dimensions relating to tip position, flow path and sample position)

[fndpth2.f](ftp://joule.pcl.ox.ac.uk/pub/rgc/afmvmaps/fndpth2.f) (finds flow path and provides a 2-D velocity map)

[bisub1.f](ftp://joule.pcl.ox.ac.uk/pub/rgc/afmvmaps/bisub1.f) (subroutine, interpolates velocities from 2-D map onto user-specified grid)

[bicall1.f](ftp://joule.pcl.ox.ac.uk/pub/rgc/afmvmaps/bicall1.f) (prototype calling program for bisub)

**Acknowledgements**

We thank EPSRC for the grant of supercomputer facilities (grant no. GR/L34167).

**References**

1. "A hydrodynamic AFM flow cell for the quantitative measurement of interfacial kinetics". Chem. Commun., (1997), 619
2. "A hydrodynamic atomic force microscopy flow cell for the quantitative measurement of interfacial kinetics: The aqueous dissolution of salicylic acid and calcium carbonate". Langmuir, 14, (1998), 218
3. "Mechanism of solid/liquid interfacial reactions. The maleic acid driven dissolution of calcite: an atomic force microscopy study under defined hydrodynamic conditions". J. Phys. Chem. B, 101, (1997), 5557
4. "Atomic force microscopy under defined hydrodynamic conditions: three-dimensional flow calculations applied to the dissolution of salicylic acid". J. Phys. Chem. B, 104, (2000), 1539
5. "AFM under known hydrodynamic conditions". [afmflow.doc](ftp://joule.pcl.ox.ac.uk/pub/rgc/afmvmaps/afmflow.doc)
